# Supplementary material for: Disproportionate exposure to urban heat island intensity across major US cities
Source: Springer Nature journal article supplement (doi:10.1038/s41467-021-22799-5), 2021-05-25
Supplement: 41467_2021_22799_MOESM1_ESM.pdf [file 41467_2021_22799_MOESM1_ESM.pdf]

# Disproportionate exposure to Urban Heat Island across major U.S. cities

Angel Hsu, Glenn Sheriff<sup>a</sup>, Tirthankar Chakraborty and Diego Manya

March 11, 2021

---

<sup>a</sup>Corresponding author. Email: gsheriff@asu.edu

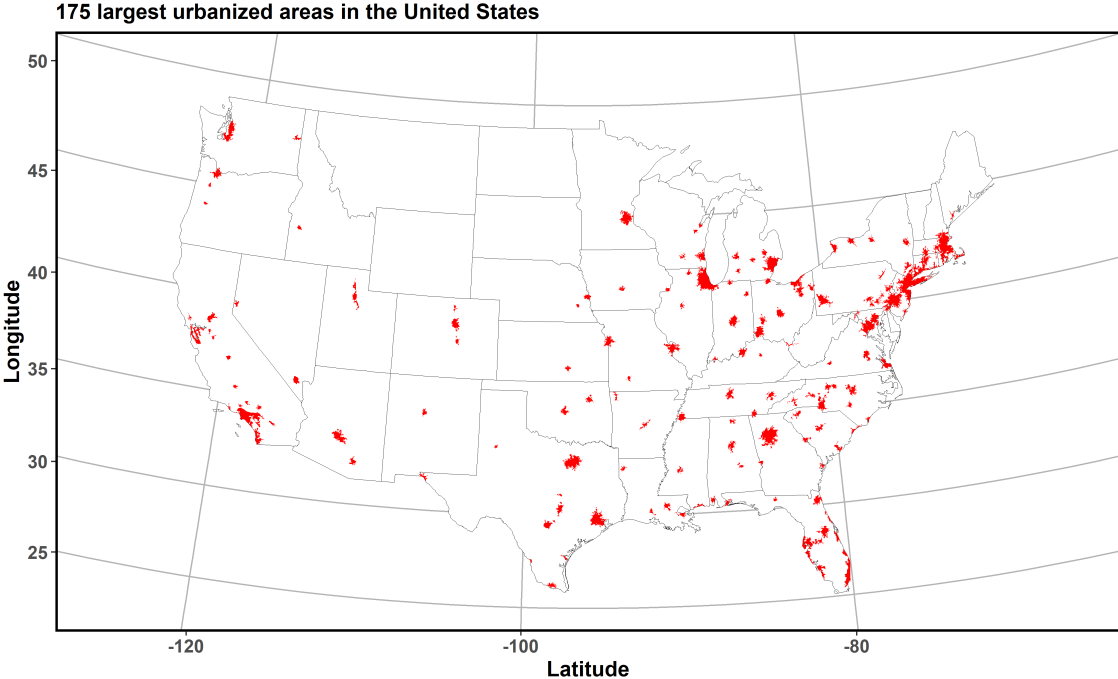

**Supplementary Figure 1.** Location and extent of urbanized areas evaluated in this study

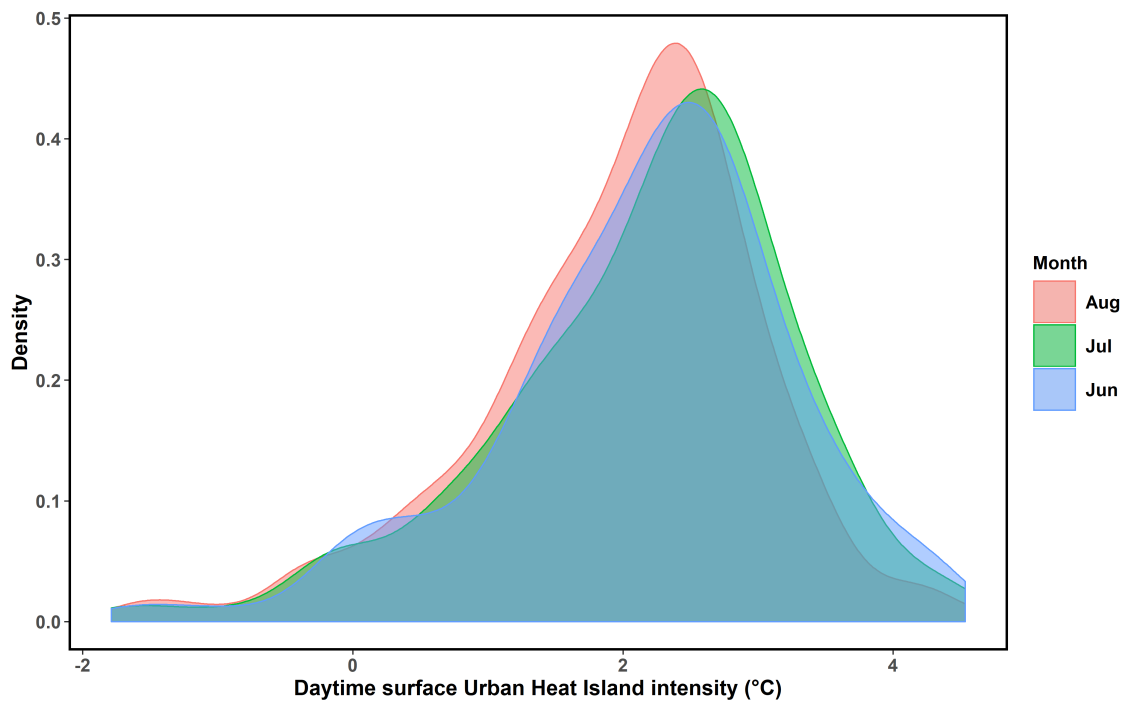

**Supplementary Figure 2.** Density plots of summer (June, July and August) surface urban heat island intensity in the 175 urbanized areas evaluated in this study

| City          | POC <sup>a</sup> -White <sup>b</sup> | Below poverty -<br>Above 2×poverty | POC <sup>a</sup> -<br>Below poverty | White <sup>b</sup> -<br>Below poverty | Above 65 -<br>Below 65 |
|---------------|--------------------------------------|------------------------------------|-------------------------------------|---------------------------------------|------------------------|
| <b>Arid</b>   |                                      |                                    |                                     |                                       |                        |
| Albuquerque   | 0.30*                                | 0.17                               | 0.03                                | -0.28*                                | -0.43***               |
| Bakersfield   | 0.33                                 | 0.45**                             | -0.16                               | -0.49**                               | -0.06                  |
| Boise City    | 0.31                                 | 0.03                               | 0.27                                | -0.04                                 | 0.02                   |
| Denver        | 1.03***                              | 0.86***                            | -0.01                               | -1.03***                              | -0.35***               |
| El Paso       | 0.26                                 | 0.04                               | 0.02                                | -0.24                                 | -0.06                  |
| Fresno        | 0.69***                              | 0.84***                            | -0.25*                              | -0.95***                              | -0.33                  |
| Indio         | 1.06***                              | 0.45*                              | 0.17                                | -0.88***                              | -0.62**                |
| Kennewick     | 0.31                                 | 0.18                               | 0.06                                | -0.25                                 | -0.13                  |
| Lancaster     | 0.15                                 | 0.48**                             | -0.25                               | -0.40*                                | -0.05                  |
| Laredo        | 0.59**                               | 0.65***                            | -0.33                               | -0.93***                              | 0.39                   |
| Las Vegas     | 0.57***                              | 0.76***                            | -0.27**                             | -0.84***                              | -0.28**                |
| Lubbock       | -0.10                                | -0.02                              | -0.07                               | 0.02                                  | 0.05                   |
| McAllen       | -0.38**                              | -0.16                              | 0.04                                | 0.42**                                | 0.21                   |
| Phoenix       | 0.59***                              | 0.67***                            | -0.12                               | -0.71***                              | -0.26***               |
| San Diego     | 0.79***                              | 0.70***                            | -0.13                               | -0.92***                              | -0.28                  |
| Santa Clarita | 0.12                                 | -0.05                              | 0.13                                | 0.01                                  | -0.18                  |
| Tucson        | 0.64***                              | 0.56***                            | -0.01                               | -0.65***                              | -0.55***               |
| Victorville   | 0.36                                 | 0.43                               | -0.12                               | -0.48*                                | -0.20                  |
| Visalia       | -0.09                                | -0.10                              | 0.03                                | 0.12                                  | 0.15                   |
| <b>Snow</b>   |                                      |                                    |                                     |                                       |                        |
| Akron         | 1.54***                              | 1.38***                            | 0.27                                | -1.27***                              | -0.30                  |
| Albany        | 2.03***                              | 2.11***                            | -0.06                               | -2.09***                              | -0.45                  |
| Allentown     | 2.43***                              | 1.79***                            | 0.42                                | -2.01***                              | -0.32                  |
| Ann Arbor     | 0.24                                 | 0.94***                            | -0.49                               | -0.73**                               | -0.32                  |
| Appleton      | 0.77**                               | 0.66**                             | 0.17                                | -0.60*                                | 0.10                   |
| Boston        | 2.60***                              | 2.16***                            | 0.11                                | -2.49***                              | -0.56***               |
| Buffalo       | 2.17***                              | 1.46***                            | 0.60**                              | -1.57***                              | -0.21                  |
| Canton        | 1.92***                              | 1.94***                            | 0.18                                | -1.74***                              | -0.18                  |
| Chicago       | 1.40***                              | 0.84***                            | 0.12                                | -1.27***                              | -0.20**                |
| Cleveland     | 1.98***                              | 1.88***                            | -0.02                               | -2.00***                              | -0.26                  |
| Columbus      | 1.18***                              | 1.72***                            | -0.45**                             | -1.63***                              | -0.27                  |
| Davenport     | 0.44                                 | 0.30                               | 0.16                                | -0.29                                 | -0.05                  |
| Des Moines    | 0.55**                               | 0.43*                              | 0.11                                | -0.44*                                | 0.04                   |
| Detroit       | 1.46***                              | 1.65***                            | -0.25**                             | -1.71***                              | -0.13                  |
| Flint         | 1.61***                              | 1.64***                            | 0.05                                | -1.56***                              | -0.26                  |
| Fort Collins  | -0.10                                | -0.11                              | 0.02                                | 0.11                                  | -0.03                  |
| Fort Wayne    | 1.07***                              | 1.29***                            | -0.13                               | -1.20***                              | -0.15                  |
| Grand Rapids  | 2.07***                              | 1.69***                            | 0.33                                | -1.74***                              | -0.35                  |
| Green Bay     | 0.96**                               | 0.93**                             | 0.09                                | -0.87**                               | 0.04                   |
| Hartford      | 2.85***                              | 2.55***                            | -0.17                               | -3.03***                              | -0.31                  |
| Indianapolis  | 1.14***                              | 1.57***                            | -0.36*                              | -1.50***                              | -0.17                  |
| Kalamazoo     | 1.30***                              | 1.67***                            | -0.15                               | -1.45***                              | -0.45                  |
| Lansing       | 1.04***                              | 1.43***                            | -0.16                               | -1.20***                              | -0.53                  |
| Lincoln       | 0.53**                               | 0.84***                            | -0.14                               | -0.67***                              | -0.23                  |
| Madison       | 0.24                                 | -0.27                              | 0.40                                | 0.16                                  | 0.04                   |
| Milwaukee     | 2.39***                              | 2.00***                            | 0.13                                | -2.26***                              | -0.53***               |
| Minneapolis   | 1.39***                              | 1.55***                            | -0.23                               | -1.61***                              | -0.23*                 |
| Nashua        | 1.89***                              | 1.89**                             | 0.03                                | -1.85**                               | 0.05                   |
| Omaha         | 0.60***                              | 0.83***                            | -0.17                               | -0.77***                              | -0.14                  |
| Peoria        | 1.18***                              | 1.07***                            | 0.11                                | -1.07***                              | -0.11                  |
| Portland      | 0.95**                               | 1.19***                            | -0.12                               | -1.07***                              | -0.28                  |
| Poughkeepsie  | 1.02***                              | 0.92***                            | -0.01                               | -1.03***                              | -0.15                  |
| Provo         | 0.52*                                | 1.02***                            | -0.35                               | -0.86***                              | -0.15                  |

**Supplementary Table 1.** City differences in surface urban heat island intensity means by race/ethnicity, income, and age. <sup>a</sup>People of color (POC) includes all who do not report as non-Hispanic white alone. <sup>b</sup>Non-Hispanic white alone. \* $p < 0.10$ , \*\* $p < 0.05$ , \*\*\* $p < 0.01$ .

*Continued on next page*

– Continued from previous page

| City             | POC <sup>a</sup> -White <sup>b</sup> | Below poverty -<br>Above 2×poverty | POC <sup>a</sup> -<br>Below poverty | White <sup>b</sup> -<br>Below poverty | Above 65 -<br>Below 65 |
|------------------|--------------------------------------|------------------------------------|-------------------------------------|---------------------------------------|------------------------|
| Rochester        | 2.80***                              | 2.58***                            | 0.06                                | -2.73***                              | -0.52*                 |
| Rockford         | 0.81**                               | 1.14***                            | -0.24                               | -1.06***                              | -0.09                  |
| Round Lake Beach | 0.84***                              | -0.04                              | 0.69**                              | -0.14                                 | -0.14                  |
| Salt Lake City   | 0.74***                              | 0.73***                            | -0.01                               | -0.76***                              | -0.19                  |
| Scranton         | 2.29***                              | 1.67***                            | 0.80                                | -1.49***                              | -0.25                  |
| South Bend       | 1.33***                              | 1.29***                            | 0.12                                | -1.20***                              | -0.51                  |
| Springfield      | 2.35***                              | 1.89***                            | 0.27                                | -2.08***                              | -0.39                  |
| Syracuse         | 2.90***                              | 2.55***                            | 0.44                                | -2.46***                              | -0.39                  |
| Toledo           | 1.30***                              | 1.11***                            | 0.18                                | -1.12***                              | -0.23                  |
| Worcester        | 2.65***                              | 2.56***                            | 0.03                                | -2.62***                              | -0.37                  |
| Youngstown       | 1.21***                              | 1.13***                            | 0.18                                | -1.03***                              | -0.19                  |
| <b>Temperate</b> |                                      |                                    |                                     |                                       |                        |
| Antioch          | -0.65                                | -0.62                              | 0.12                                | 0.76                                  | 0.30                   |
| Asheville        | 0.70**                               | 0.40                               | 0.29                                | -0.41                                 | -0.23                  |
| Atlanta          | 1.09***                              | 0.78***                            | -0.05                               | -1.14***                              | -0.37***               |
| Atlantic City    | 0.98***                              | 0.77**                             | -0.02                               | -1.00***                              | -0.22                  |
| Augusta          | 0.97***                              | 0.85***                            | -0.05                               | -1.02***                              | -0.00                  |
| Austin           | 0.66***                              | 0.74***                            | -0.20                               | -0.86***                              | -0.40**                |
| Baltimore        | 1.73***                              | 2.05***                            | -0.71***                            | -2.44***                              | -0.37**                |
| Barnstable Town  | 0.59*                                | 0.45                               | 0.17                                | -0.42                                 | -0.08                  |
| Baton Rouge      | 0.99***                              | 0.30                               | 0.33                                | -0.66*                                | 0.27                   |
| Birmingham       | 2.23***                              | 1.79***                            | -0.00                               | -2.23***                              | -0.15                  |
| Bremerton        | 0.73                                 | 0.89*                              | -0.06                               | -0.78                                 | -0.42                  |
| Bridgeport       | 3.25***                              | 2.62***                            | -0.05                               | -3.30***                              | -0.71**                |
| Cape Coral       | 0.64**                               | 0.40                               | 0.18                                | -0.46*                                | -0.58**                |
| Charleston       | 0.77***                              | 0.97***                            | -0.23                               | -1.01***                              | -0.24                  |
| Charlotte        | 1.11***                              | 0.92***                            | -0.07                               | -1.18***                              | -0.37**                |
| Chattanooga      | 1.97***                              | 1.54***                            | 0.40                                | -1.57***                              | -0.33                  |
| Cincinnati       | 1.45***                              | 0.96***                            | 0.39**                              | -1.06***                              | -0.06                  |
| Colorado Springs | 0.93***                              | 0.88***                            | 0.00                                | -0.93***                              | -0.41                  |
| Columbia         | 0.54*                                | 0.78**                             | -0.18                               | -0.72**                               | -0.29                  |
| Columbus         | 1.36**                               | 1.62***                            | -0.45                               | -1.81***                              | 0.03                   |
| Concord          | 0.62*                                | 0.73**                             | -0.27                               | -0.89***                              | -0.54                  |
| Concord          | 0.73***                              | 0.15                               | 0.38                                | -0.35                                 | -0.15                  |
| Conroe           | 0.53                                 | -0.15                              | 0.50                                | -0.03                                 | -0.23                  |
| Corpus Christi   | 1.17***                              | 0.28                               | 0.16                                | -1.00**                               | 0.05                   |
| Dallas           | 0.49***                              | 0.49***                            | -0.13                               | -0.62***                              | -0.11                  |
| Danbury          | 2.43***                              | 2.11**                             | 0.00                                | -2.43***                              | -0.50                  |
| Dayton           | 0.45*                                | 0.81***                            | -0.22                               | -0.66***                              | -0.18                  |
| Denton           | 0.58*                                | 0.52                               | -0.01                               | -0.59*                                | -0.26                  |
| Durham           | 1.18***                              | 1.24***                            | -0.25                               | -1.43***                              | -0.58                  |
| Eugene           | 0.62                                 | 1.24**                             | -0.32                               | -0.94**                               | -0.60                  |
| Evansville       | 1.11**                               | 1.07**                             | 0.23                                | -0.88**                               | -0.05                  |
| Fayetteville     | 0.27                                 | 0.20                               | 0.05                                | -0.22                                 | 0.13                   |
| Fayetteville     | 1.18***                              | 0.88**                             | 0.26                                | -0.93***                              | -0.86**                |
| Greensboro       | 1.72***                              | 1.88***                            | -0.29                               | -2.01***                              | -0.45                  |
| Greenville       | 1.07***                              | 0.14                               | 0.67**                              | -0.41                                 | -0.06                  |
| Gulfport         | 0.52*                                | 0.32                               | 0.16                                | -0.36                                 | 0.06                   |
| Hagerstown       | 0.80                                 | 1.27***                            | -0.40                               | -1.20**                               | -0.03                  |
| Harrisburg       | 1.06***                              | 0.64*                              | 0.34                                | -0.72**                               | 0.05                   |
| Hickory          | 0.82***                              | 0.30                               | 0.45                                | -0.36                                 | -0.00                  |
| Houston          | 1.07***                              | 0.78***                            | -0.20                               | -1.27***                              | -0.15                  |
| Huntington       | 1.68***                              | 0.69*                              | 1.08*                               | -0.60                                 | -0.07                  |
| Huntsville       | 0.85**                               | 1.45***                            | -0.58                               | -1.43***                              | -0.12                  |

**Supplementary Table 1.** City differences in surface urban heat island intensity means by race/ethnicity, income, and age. <sup>a</sup>People of color (POC) includes all who do not report as non-Hispanic white alone. <sup>b</sup>Non-Hispanic white alone. \* $p < 0.10$ , \*\* $p < 0.05$ , \*\*\* $p < 0.01$ .

Continued on next page

– Continued from previous page

| City           | POC <sup>a</sup> -White <sup>b</sup> | Below poverty -<br>Above 2×poverty | POC <sup>a</sup> -<br>Below poverty | White <sup>b</sup> -<br>Below poverty | Above 65 -<br>Below 65 |
|----------------|--------------------------------------|------------------------------------|-------------------------------------|---------------------------------------|------------------------|
| Jackson        | 0.74**                               | 0.95***                            | -0.29                               | -1.04***                              | -0.07                  |
| Jacksonville   | 1.00***                              | 1.12***                            | -0.23                               | -1.23***                              | -0.20                  |
| Kansas City    | 0.49***                              | 0.51***                            | -0.06                               | -0.55***                              | -0.03                  |
| Killeen        | 0.59                                 | 0.25                               | 0.17                                | -0.42                                 | -0.34                  |
| Kissimmee      | 0.88                                 | 0.39                               | 0.03                                | -0.84                                 | -0.14                  |
| Knoxville      | 1.15***                              | 0.90***                            | 0.32                                | -0.83**                               | -0.43*                 |
| Lafayette      | 0.01                                 | 0.07                               | -0.02                               | -0.03                                 | 0.11                   |
| Lakeland       | 0.23                                 | 0.10                               | 0.08                                | -0.15                                 | 0.01                   |
| Lancaster      | 2.43***                              | 1.27***                            | 1.02*                               | -1.42***                              | -0.20                  |
| Lexington      | 0.37                                 | 1.44***                            | -0.72**                             | -1.08***                              | -0.24                  |
| Little Rock    | 1.10***                              | 0.74***                            | 0.14                                | -0.96***                              | -0.03                  |
| Los Angeles    | 1.82***                              | 0.77***                            | 0.05                                | -1.77***                              | -0.46***               |
| Louisville     | 1.53***                              | 1.39***                            | 0.11                                | -1.42***                              | -0.10                  |
| Memphis        | 0.91***                              | 0.77***                            | -0.12                               | -1.03***                              | -0.06                  |
| Mission Viejo  | 0.64*                                | -0.03                              | 0.46                                | -0.18                                 | -0.19                  |
| Mobile         | 0.83**                               | 0.36                               | 0.22                                | -0.61*                                | 0.04                   |
| Modesto        | 0.51                                 | 0.53                               | -0.08                               | -0.59                                 | -0.12                  |
| Montgomery     | 1.05**                               | 0.34                               | 0.22                                | -0.83                                 | 0.13                   |
| Murrieta       | 0.29                                 | 0.40                               | -0.18                               | -0.47                                 | 0.40                   |
| Myrtle Beach   | 0.25                                 | 0.41                               | -0.11                               | -0.36                                 | -0.18                  |
| Nashville      | 0.88***                              | 1.23***                            | -0.32                               | -1.19***                              | -0.30                  |
| New Haven      | 2.34***                              | 2.23***                            | -0.18                               | -2.52***                              | -0.68**                |
| New Orleans    | -0.09                                | 0.30                               | -0.24                               | -0.15                                 | 0.24                   |
| New York       | 2.19***                              | 1.31***                            | 0.03                                | -2.16***                              | -0.39***               |
| Norwich        | 1.00***                              | 1.21***                            | -0.22                               | -1.21***                              | -0.26                  |
| Ogden          | 0.80***                              | 0.84***                            | 0.00                                | -0.80***                              | -0.21                  |
| Oklahoma City  | 0.62***                              | 0.70***                            | -0.09                               | -0.71***                              | -0.23                  |
| Orlando        | 0.97***                              | 0.80***                            | -0.08                               | -1.04***                              | -0.09                  |
| Oxnard         | 1.03***                              | 0.52*                              | 0.01                                | -1.03***                              | -0.35                  |
| Palm Bay       | 0.39                                 | 0.51*                              | -0.07                               | -0.47                                 | -0.20                  |
| Palm Coast     | 1.19***                              | 0.73**                             | 0.42                                | -0.77***                              | -0.51*                 |
| Pensacola      | 1.00***                              | 0.62*                              | 0.27                                | -0.74**                               | -0.16                  |
| Philadelphia   | 2.51***                              | 2.59***                            | -0.45**                             | -2.96***                              | -0.40***               |
| Pittsburgh     | 1.41***                              | 1.13***                            | 0.31*                               | -1.10***                              | -0.22                  |
| Portland       | 0.97***                              | 0.97***                            | -0.00                               | -0.98***                              | -0.39**                |
| Port St. Lucie | 1.14***                              | 0.59                               | 0.32                                | -0.82**                               | -0.92**                |
| Providence     | 3.57***                              | 2.31***                            | 0.97***                             | -2.60***                              | -0.66**                |
| Raleigh        | 0.71***                              | 0.80***                            | -0.17                               | -0.88***                              | -0.23                  |
| Reading        | 3.32***                              | 2.79***                            | 0.20                                | -3.11***                              | -0.62                  |
| Reno           | 0.59**                               | 0.50**                             | 0.04                                | -0.55**                               | -0.40                  |
| Richmond       | 0.97***                              | 1.39***                            | -0.51**                             | -1.48***                              | -0.29                  |
| Riverside      | 0.97***                              | 0.88***                            | -0.31**                             | -1.28***                              | -0.25*                 |
| Roanoke        | 2.19***                              | 1.59***                            | 0.50                                | -1.69***                              | -0.35                  |
| Sacramento     | 0.49***                              | 0.55***                            | -0.15                               | -0.63***                              | -0.29*                 |
| St. Louis      | 1.23***                              | 0.93***                            | 0.15                                | -1.08***                              | -0.06                  |
| Salem          | 1.38***                              | 1.47***                            | -0.01                               | -1.38***                              | -0.62                  |
| San Antonio    | 0.86***                              | 0.81***                            | -0.27**                             | -1.13***                              | -0.04                  |
| San Francisco  | 1.51***                              | 0.53**                             | 0.17                                | -1.34***                              | -0.58**                |
| San Jose       | 0.86***                              | 0.51***                            | -0.12                               | -0.98***                              | -0.24                  |
| Santa Rosa     | 0.88***                              | 0.42                               | 0.24                                | -0.63*                                | -0.80**                |
| Sarasota       | 0.70**                               | 0.87***                            | -0.10                               | -0.79***                              | -0.31                  |
| Savannah       | 1.32***                              | 1.58***                            | -0.39                               | -1.72***                              | -0.13                  |
| Seattle        | 1.01***                              | 1.21***                            | -0.29*                              | -1.30***                              | -0.40**                |
| Shreveport     | 0.90**                               | 0.88**                             | -0.11                               | -1.01**                               | -0.10                  |
| Spokane        | 0.50*                                | 0.86***                            | -0.10                               | -0.60**                               | -0.22                  |

**Supplementary Table 1.** City differences in surface urban heat island intensity means by race/ethnicity, income, and age. <sup>a</sup>People of color (POC) includes all who do not report as non-Hispanic white alone. <sup>b</sup>Non-Hispanic white alone. \* $p < 0.10$ , \*\* $p < 0.05$ , \*\*\* $p < 0.01$ .

Continued on next page

– Continued from previous page

| City              | POC <sup>a</sup> -White <sup>b</sup> | Below poverty -<br>Above 2×poverty | POC <sup>a</sup> -<br>Below poverty | White <sup>b</sup> -<br>Below poverty | Above 65 -<br>Below 65 |
|-------------------|--------------------------------------|------------------------------------|-------------------------------------|---------------------------------------|------------------------|
| Springfield       | 0.96**                               | 1.45***                            | −0.07                               | −1.04***                              | −0.24                  |
| Stockton          | 0.84**                               | 0.90***                            | −0.31                               | −1.15***                              | −0.31                  |
| Tallahassee       | 0.79                                 | 2.55***                            | −1.20**                             | −1.99***                              | −1.11**                |
| Tampa             | 0.48***                              | 0.75***                            | −0.21                               | −0.69***                              | 0.01                   |
| Trenton           | 2.04***                              | 1.82***                            | −0.36                               | −2.40***                              | −0.62                  |
| Tulsa             | 0.62**                               | 0.60**                             | −0.00                               | −0.62**                               | −0.11                  |
| Virginia Beach    | 1.22***                              | 1.00***                            | −0.10                               | −1.32***                              | −0.28                  |
| Washington, D.C.  | 0.73***                              | 0.94***                            | −0.46***                            | −1.19***                              | −0.28***               |
| Wichita           | 0.61***                              | 0.86***                            | −0.20                               | −0.81***                              | −0.08                  |
| Wilmington        | 0.77*                                | 0.96**                             | −0.06                               | −0.83*                                | −0.37                  |
| Winston           | 1.36***                              | 1.15***                            | 0.09                                | −1.26***                              | −0.23                  |
| Winter Haven      | 0.71**                               | 0.37                               | 0.18                                | −0.53*                                | −0.28                  |
| York              | 2.95***                              | 2.83***                            | 0.09                                | −2.86***                              | −0.52                  |
| <b>Equatorial</b> |                                      |                                    |                                     |                                       |                        |
| Bonita Springs    | 0.26                                 | 0.42                               | −0.16                               | −0.42                                 | −0.07                  |
| Miami             | 1.25***                              | 1.01***                            | −0.25**                             | −1.50***                              | −0.17                  |

**Supplementary Table 1.** City differences in surface urban heat island intensity means by race/ethnicity, income, and age. <sup>a</sup>People of color (POC) includes all who do not report as non-Hispanic white alone. <sup>b</sup>Non-Hispanic white alone. \* $p < 0.10$ , \*\* $p < 0.05$ , \*\*\* $p < 0.01$ .

| City            | Tracts | People per tract |                |                |                |                |               |                |                |                |
|-----------------|--------|------------------|----------------|----------------|----------------|----------------|---------------|----------------|----------------|----------------|
|                 |        | Total            | POC            | Hispanic       | Non-Hispanic   |                |               | Poverty Status |                |                |
|                 |        |                  |                |                | Black          | White          | Other         | <1×            | 1-2×           | >2×            |
| Akron           | 147    | 4061<br>(1707)   | 802<br>(830)   | 72<br>(76)     | 512<br>(706)   | 3259<br>(1782) | 217<br>(259)  | 586<br>(444)   | 735<br>(425)   | 2644<br>(1596) |
| Albany          | 166    | 4019<br>(1757)   | 951<br>(833)   | 224<br>(191)   | 371<br>(524)   | 3068<br>(1708) | 356<br>(309)  | 455<br>(406)   | 513<br>(330)   | 2896<br>(1701) |
| Albuquerque     | 173    | 4569<br>(1995)   | 2733<br>(1660) | 2216<br>(1531) | 112<br>(132)   | 1837<br>(1098) | 405<br>(409)  | 785<br>(588)   | 877<br>(554)   | 2855<br>(1544) |
| Allentown       | 167    | 4662<br>(1769)   | 1205<br>(1191) | 749<br>(953)   | 228<br>(236)   | 3456<br>(1759) | 228<br>(222)  | 508<br>(514)   | 709<br>(454)   | 3286<br>(1658) |
| Ann Arbor       | 89     | 3575<br>(1448)   | 1167<br>(707)  | 165<br>(129)   | 486<br>(512)   | 2408<br>(1270) | 515<br>(473)  | 551<br>(674)   | 450<br>(292)   | 2399<br>(1318) |
| Antioch         | 45     | 6324<br>(2623)   | 4187<br>(1871) | 2259<br>(1111) | 871<br>(661)   | 2137<br>(1535) | 1057<br>(750) | 819<br>(553)   | 1115<br>(672)  | 4348<br>(2301) |
| Appleton        | 58     | 4398<br>(2085)   | 512<br>(329)   | 201<br>(153)   | 58<br>(80)     | 3886<br>(2006) | 253<br>(190)  | 375<br>(249)   | 622<br>(318)   | 3334<br>(1877) |
| Asheville       | 95     | 4472<br>(1671)   | 673<br>(496)   | 310<br>(319)   | 211<br>(284)   | 3799<br>(1515) | 151<br>(142)  | 592<br>(305)   | 908<br>(517)   | 2877<br>(1257) |
| Atlanta         | 885    | 6019<br>(3010)   | 3229<br>(2460) | 657<br>(815)   | 2057<br>(2194) | 2790<br>(2307) | 514<br>(614)  | 814<br>(634)   | 1049<br>(782)  | 4062<br>(2495) |
| Atlantic City   | 76     | 3657<br>(2497)   | 1517<br>(1604) | 621<br>(680)   | 510<br>(726)   | 2140<br>(1783) | 387<br>(566)  | 533<br>(483)   | 613<br>(482)   | 2435<br>(2054) |
| Augusta         | 94     | 5225<br>(2726)   | 2357<br>(1710) | 288<br>(326)   | 1811<br>(1521) | 2868<br>(2132) | 259<br>(271)  | 874<br>(594)   | 1001<br>(572)  | 3220<br>(2357) |
| Austin          | 302    | 5726<br>(3124)   | 2731<br>(2159) | 1822<br>(1687) | 404<br>(509)   | 2995<br>(1964) | 506<br>(567)  | 655<br>(697)   | 834<br>(691)   | 4144<br>(2755) |
| Bakersfield     | 95     | 5996<br>(3453)   | 3902<br>(2819) | 3113<br>(2348) | 322<br>(357)   | 2094<br>(1811) | 467<br>(637)  | 1311<br>(1096) | 1362<br>(1019) | 3266<br>(2744) |
| Baltimore       | 576    | 4006<br>(1893)   | 1952<br>(1499) | 241<br>(336)   | 1349<br>(1362) | 2054<br>(1635) | 362<br>(439)  | 448<br>(367)   | 533<br>(392)   | 2918<br>(1778) |
| Barnstable Town | 64     | 4077<br>(1495)   | 407<br>(339)   | 108<br>(121)   | 99<br>(132)    | 3670<br>(1376) | 199<br>(199)  | 302<br>(190)   | 492<br>(274)   | 3227<br>(1343) |
| Baton Rouge     | 127    | 5651<br>(2882)   | 2457<br>(1517) | 232<br>(281)   | 1981<br>(1493) | 3194<br>(2885) | 244<br>(256)  | 905<br>(720)   | 905<br>(508)   | 3722<br>(2592) |
| Birmingham      | 209    | 4246<br>(2116)   | 1784<br>(1282) | 184<br>(247)   | 1450<br>(1276) | 2463<br>(2220) | 150<br>(171)  | 635<br>(453)   | 727<br>(451)   | 2811<br>(1969) |
| Boise City      | 59     | 7375<br>(5013)   | 1090<br>(636)  | 580<br>(428)   | 92<br>(132)    | 6285<br>(4584) | 418<br>(274)  | 855<br>(613)   | 1131<br>(722)  | 5249<br>(4159) |
| Bonita Springs  | 76     | 5007<br>(3799)   | 1587<br>(2109) | 1207<br>(1731) | 264<br>(407)   | 3421<br>(2401) | 116<br>(130)  | 532<br>(543)   | 853<br>(906)   | 3575<br>(2789) |
| Boston          | 985    | 4787<br>(1743)   | 1383<br>(1250) | 518<br>(768)   | 360<br>(672)   | 3404<br>(1847) | 505<br>(476)  | 464<br>(420)   | 520<br>(382)   | 3646<br>(1679) |
| Bremerton       | 53     | 4724<br>(1611)   | 1081<br>(628)  | 354<br>(249)   | 121<br>(125)   | 3642<br>(1269) | 607<br>(363)  | 458<br>(267)   | 636<br>(381)   | 3491<br>(1477) |
| Bridgeport      | 205    | 4399<br>(1605)   | 1629<br>(1410) | 840<br>(837)   | 478<br>(625)   | 2770<br>(1661) | 311<br>(270)  | 388<br>(353)   | 552<br>(470)   | 3378<br>(1516) |
| Buffalo         | 264    | 3913<br>(1677)   | 908<br>(981)   | 193<br>(263)   | 497<br>(824)   | 3005<br>(1943) | 219<br>(268)  | 573<br>(489)   | 603<br>(292)   | 2647<br>(1718) |
| Canton          | 80     | 4471<br>(1744)   | 580<br>(504)   | 82<br>(86)     | 305<br>(413)   | 3891<br>(1782) | 192<br>(137)  | 586<br>(431)   | 771<br>(368)   | 3019<br>(1643) |
| Cape Coral      | 154    | 4199<br>(2583)   | 1358<br>(1465) | 859<br>(991)   | 365<br>(604)   | 2840<br>(1862) | 135<br>(127)  | 630<br>(578)   | 856<br>(698)   | 2645<br>(1742) |
| Charleston      | 141    | 4887<br>(3034)   | 1720<br>(1193) | 277<br>(315)   | 1215<br>(951)  | 3167<br>(2603) | 228<br>(201)  | 637<br>(465)   | 802<br>(520)   | 3327<br>(2649) |
| Charlotte       | 323    | 4629<br>(1988)   | 1980<br>(1544) | 534<br>(554)   | 1114<br>(1078) | 2650<br>(1893) | 332<br>(339)  | 557<br>(472)   | 758<br>(543)   | 3254<br>(1866) |
| Chattanooga     | 100    | 4562<br>(2112)   | 1107<br>(1063) | 215<br>(285)   | 713<br>(955)   | 3455<br>(2153) | 178<br>(170)  | 645<br>(502)   | 850<br>(443)   | 2944<br>(1843) |
| Chicago         | 2070   | 4288             | 2076           | 961            | 747            | 2212           | 368           | 554            | 683            | 2980           |

**Supplementary Table 2.** City demographic summary statistics. Standard deviations in parentheses. People of color (POC) includes all who do not report as non-Hispanic white alone.

*Continued on next page*

– Continued from previous page

| City             | Tracts | People per tract |        |          |              |        |        |                |       |        |
|------------------|--------|------------------|--------|----------|--------------|--------|--------|----------------|-------|--------|
|                  |        | Total            | POC    | Hispanic | Non-Hispanic |        |        | Poverty Status |       |        |
|                  |        |                  |        |          | Black        | White  | Other  | <1×            | 1-2×  | >2×    |
|                  |        | (2164)           | (1535) | (1218)   | (1145)       | (1962) | (496)  | (459)          | (519) | (1947) |
| Cincinnati       | 417    | 4308             | 970    | 138      | 607          | 3338   | 224    | 547            | 630   | 3042   |
|                  |        | (2358)           | (965)  | (194)    | (840)        | (2337) | (305)  | (447)          | (378) | (2247) |
| Cleveland        | 582    | 3225             | 985    | 154      | 676          | 2240   | 155    | 459            | 509   | 2198   |
|                  |        | (1717)           | (814)  | (237)    | (803)        | (1894) | (171)  | (377)          | (310) | (1665) |
| Colorado Springs | 129    | 5171             | 1564   | 855      | 302          | 3607   | 406    | 555            | 844   | 3629   |
|                  |        | (2372)           | (1059) | (618)    | (280)        | (1819) | (288)  | (448)          | (553) | (2264) |
| Columbia         | 158    | 4324             | 1889   | 229      | 1441         | 2435   | 220    | 608            | 754   | 2745   |
|                  |        | (2583)           | (1776) | (269)    | (1558)       | (1736) | (220)  | (456)          | (454) | (2203) |
| Columbus         | 74     | 4119             | 2145   | 275      | 1626         | 1975   | 244    | 772            | 851   | 2326   |
|                  |        | (2616)           | (1516) | (329)    | (1378)       | (2015) | (282)  | (446)          | (536) | (2156) |
| Columbus         | 340    | 4639             | 1457   | 216      | 858          | 3182   | 383    | 650            | 696   | 3195   |
|                  |        | (2483)           | (1257) | (223)    | (1021)       | (2178) | (412)  | (577)          | (484) | (2347) |
| Concord          | 132    | 5538             | 2371   | 778      | 155          | 3167   | 1438   | 324            | 419   | 4731   |
|                  |        | (1810)           | (1518) | (756)    | (207)        | (1318) | (1228) | (306)          | (416) | (1738) |
| Concord          | 70     | 5052             | 1667   | 480      | 953          | 3385   | 234    | 683            | 939   | 3348   |
|                  |        | (2267)           | (1110) | (362)    | (753)        | (1944) | (309)  | (415)          | (501) | (1969) |
| Conroe           | 49     | 9104             | 3019   | 2042     | 517          | 6084   | 460    | 799            | 1301  | 6934   |
|                  |        | (5890)           | (2177) | (1508)   | (547)        | (4270) | (458)  | (663)          | (873) | (5429) |
| Corpus Christi   | 82     | 4388             | 2974   | 2677     | 160          | 1413   | 138    | 656            | 899   | 2734   |
|                  |        | (1681)           | (1394) | (1350)   | (153)        | (1208) | (153)  | (490)          | (556) | (1493) |
| Dallas           | 1122   | 5334             | 3003   | 1614     | 891          | 2331   | 498    | 724            | 1012  | 3540   |
|                  |        | (2772)           | (2003) | (1395)   | (1088)       | (2022) | (655)  | (618)          | (742) | (2503) |
| Danbury          | 50     | 5099             | 1335   | 821      | 161          | 3764   | 353    | 338            | 530   | 4105   |
|                  |        | (1716)           | (1298) | (963)    | (177)        | (1434) | (331)  | (352)          | (394) | (1464) |
| Davenport        | 87     | 3684             | 845    | 341      | 317          | 2839   | 187    | 476            | 595   | 2516   |
|                  |        | (1462)           | (483)  | (268)    | (313)        | (1435) | (147)  | (294)          | (238) | (1366) |
| Dayton           | 206    | 3889             | 910    | 110      | 589          | 2979   | 210    | 578            | 664   | 2532   |
|                  |        | (1985)           | (842)  | (132)    | (818)        | (2010) | (230)  | (414)          | (430) | (1849) |
| Denton           | 74     | 5112             | 1919   | 1056     | 389          | 3193   | 475    | 526            | 681   | 3746   |
|                  |        | (2339)           | (1055) | (864)    | (316)        | (1960) | (285)  | (521)          | (546) | (2179) |
| Denver           | 581    | 4582             | 1683   | 1094     | 258          | 2899   | 331    | 475            | 678   | 3371   |
|                  |        | (1800)           | (1388) | (1097)   | (437)        | (1495) | (265)  | (436)          | (547) | (1588) |
| Des Moines       | 109    | 4917             | 994    | 369      | 277          | 3924   | 348    | 515            | 710   | 3608   |
|                  |        | (3215)           | (759)  | (341)    | (302)        | (3123) | (307)  | (389)          | (444) | (2942) |
| Detroit          | 1158   | 3312             | 1199   | 146      | 818          | 2113   | 236    | 537            | 542   | 2199   |
|                  |        | (1581)           | (1024) | (328)    | (995)        | (1700) | (340)  | (480)          | (352) | (1496) |
| Durham           | 85     | 5049             | 2501   | 622      | 1448         | 2549   | 431    | 763            | 792   | 3218   |
|                  |        | (2074)           | (1680) | (583)    | (1269)       | (1618) | (399)  | (597)          | (602) | (1960) |
| El Paso          | 166    | 5232             | 4591   | 4320     | 153          | 640    | 118    | 1153           | 1393  | 2594   |
|                  |        | (3216)           | (2923) | (2769)   | (255)        | (666)  | (159)  | (701)          | (819) | (2388) |
| Eugene           | 66     | 4410             | 836    | 400      | 54           | 3574   | 382    | 821            | 873   | 2612   |
|                  |        | (1428)           | (508)  | (337)    | (63)         | (1086) | (276)  | (728)          | (394) | (1140) |
| Evansville       | 68     | 4112             | 572    | 97       | 306          | 3540   | 170    | 643            | 726   | 2617   |
|                  |        | (2409)           | (458)  | (127)    | (307)        | (2307) | (179)  | (385)          | (456) | (2176) |
| Fayetteville     | 80     | 4999             | 2781   | 583      | 1731         | 2218   | 467    | 880            | 1113  | 2790   |
|                  |        | (2687)           | (1572) | (394)    | (1110)       | (1484) | (338)  | (497)          | (618) | (2031) |
| Fayetteville     | 70     | 6054             | 1663   | 1022     | 160          | 4391   | 482    | 812            | 1257  | 3846   |
|                  |        | (2117)           | (1564) | (1215)   | (213)        | (1633) | (461)  | (705)          | (860) | (1583) |
| Flint            | 128    | 3206             | 883    | 105      | 638          | 2322   | 140    | 627            | 616   | 1924   |
|                  |        | (1548)           | (822)  | (95)     | (773)        | (1623) | (140)  | (490)          | (373) | (1352) |
| Fort Collins     | 73     | 4547             | 780    | 522      | 40           | 3766   | 218    | 533            | 643   | 3240   |
|                  |        | (2625)           | (526)  | (416)    | (47)         | (2244) | (180)  | (439)          | (461) | (2316) |
| Fort Wayne       | 95     | 3868             | 981    | 278      | 436          | 2887   | 268    | 559            | 748   | 2494   |
|                  |        | (1481)           | (923)  | (268)    | (562)        | (1593) | (261)  | (439)          | (414) | (1537) |
| Fresno           | 154    | 4675             | 3116   | 2109     | 282          | 1559   | 725    | 1135           | 979   | 2497   |
|                  |        | (1748)           | (1612) | (1138)   | (311)        | (1083) | (553)  | (843)          | (590) | (1538) |

**Supplementary Table 2.** City demographic summary statistics. Standard deviations in parentheses. People of color (POC) includes all who do not report as non-Hispanic white alone.

Continued on next page



– Continued from previous page

| City         | Tracts | People per tract |                |                |                |                |               |                |                |                |
|--------------|--------|------------------|----------------|----------------|----------------|----------------|---------------|----------------|----------------|----------------|
|              |        | Total            | POC            | Hispanic       | Non-Hispanic   |                |               | Poverty Status |                |                |
|              |        |                  |                |                | Black          | White          | Other         | <1×            | 1-2×           | >2×            |
| Grand Rapids | 137    | 5116<br>(2001)   | 1241<br>(1045) | 498<br>(652)   | 438<br>(601)   | 3875<br>(2102) | 305<br>(230)  | 658<br>(574)   | 888<br>(504)   | 3460<br>(1898) |
| Green Bay    | 53     | 4880<br>(2731)   | 897<br>(732)   | 404<br>(476)   | 106<br>(125)   | 3983<br>(2522) | 387<br>(399)  | 535<br>(342)   | 848<br>(550)   | 3358<br>(2439) |
| Greensboro   | 77     | 4392<br>(1939)   | 2193<br>(1595) | 338<br>(321)   | 1573<br>(1337) | 2200<br>(1692) | 282<br>(259)  | 751<br>(622)   | 888<br>(556)   | 2594<br>(1682) |
| Greenville   | 127    | 4419<br>(2056)   | 1216<br>(864)  | 353<br>(353)   | 684<br>(616)   | 3204<br>(1899) | 179<br>(200)  | 691<br>(512)   | 927<br>(478)   | 2679<br>(1713) |
| Gulfport     | 57     | 4908<br>(3136)   | 1604<br>(1038) | 271<br>(226)   | 1031<br>(793)  | 3303<br>(2536) | 302<br>(283)  | 884<br>(617)   | 1021<br>(714)  | 2894<br>(2165) |
| Hagerstown   | 46     | 5934<br>(2654)   | 1059<br>(835)  | 268<br>(191)   | 514<br>(613)   | 4875<br>(2403) | 277<br>(196)  | 713<br>(484)   | 984<br>(519)   | 4021<br>(2232) |
| Harrisburg   | 121    | 4619<br>(1862)   | 1038<br>(982)  | 277<br>(340)   | 472<br>(633)   | 3581<br>(2001) | 289<br>(263)  | 437<br>(386)   | 666<br>(327)   | 3378<br>(1769) |
| Hartford     | 239    | 4165<br>(1613)   | 1456<br>(1135) | 666<br>(745)   | 484<br>(672)   | 2709<br>(1833) | 305<br>(345)  | 443<br>(398)   | 531<br>(385)   | 3048<br>(1645) |
| Hickory      | 61     | 5004<br>(1494)   | 1004<br>(693)  | 386<br>(363)   | 342<br>(346)   | 4000<br>(1413) | 277<br>(250)  | 810<br>(356)   | 1142<br>(450)  | 2930<br>(1161) |
| Houston      | 908    | 6236<br>(4421)   | 4170<br>(3217) | 2411<br>(1927) | 1122<br>(1415) | 2066<br>(2381) | 637<br>(1130) | 938<br>(740)   | 1186<br>(877)  | 4046<br>(3885) |
| Huntington   | 74     | 3695<br>(1692)   | 246<br>(230)   | 43<br>(68)     | 102<br>(162)   | 3449<br>(1698) | 100<br>(88)   | 700<br>(393)   | 692<br>(342)   | 2196<br>(1386) |
| Huntsville   | 72     | 5103<br>(3204)   | 1792<br>(1277) | 242<br>(246)   | 1233<br>(1055) | 3311<br>(2687) | 317<br>(300)  | 656<br>(560)   | 711<br>(488)   | 3578<br>(2929) |
| Indianapolis | 323    | 5215<br>(3215)   | 1551<br>(1344) | 372<br>(439)   | 872<br>(999)   | 3663<br>(3029) | 308<br>(411)  | 705<br>(553)   | 881<br>(549)   | 3543<br>(2986) |
| Indio        | 92     | 4302<br>(2192)   | 2552<br>(2394) | 2255<br>(2389) | 94<br>(133)    | 1750<br>(1194) | 202<br>(187)  | 796<br>(739)   | 1028<br>(820)  | 2456<br>(1304) |
| Jackson      | 101    | 4481<br>(2757)   | 2340<br>(1595) | 91<br>(130)    | 2141<br>(1599) | 2141<br>(2367) | 107<br>(126)  | 703<br>(519)   | 812<br>(553)   | 2834<br>(2474) |
| Jacksonville | 215    | 5618<br>(3552)   | 2272<br>(1788) | 500<br>(495)   | 1348<br>(1430) | 3346<br>(2688) | 425<br>(502)  | 775<br>(558)   | 985<br>(640)   | 3749<br>(3064) |
| Kalamazoo    | 56     | 4716<br>(2059)   | 1046<br>(756)  | 236<br>(193)   | 491<br>(590)   | 3670<br>(1952) | 318<br>(223)  | 753<br>(682)   | 794<br>(435)   | 3013<br>(1862) |
| Kansas City  | 439    | 3780<br>(2075)   | 1160<br>(824)  | 381<br>(418)   | 536<br>(654)   | 2620<br>(2014) | 243<br>(219)  | 446<br>(386)   | 615<br>(413)   | 2670<br>(1956) |
| Kennewick    | 46     | 5523<br>(2745)   | 2030<br>(2023) | 1618<br>(1957) | 91<br>(101)    | 3493<br>(2001) | 320<br>(276)  | 759<br>(780)   | 1051<br>(882)  | 3661<br>(2039) |
| Killeen      | 51     | 5055<br>(3311)   | 2911<br>(2334) | 1133<br>(861)  | 1261<br>(1204) | 2144<br>(1504) | 517<br>(405)  | 637<br>(460)   | 1145<br>(854)  | 3016<br>(2537) |
| Kissimmee    | 43     | 8442<br>(5498)   | 5768<br>(4660) | 4460<br>(3598) | 772<br>(981)   | 2674<br>(1894) | 535<br>(489)  | 1363<br>(982)  | 2312<br>(1819) | 4710<br>(3223) |
| Knoxville    | 171    | 4283<br>(1703)   | 616<br>(568)   | 171<br>(190)   | 273<br>(445)   | 3667<br>(1707) | 171<br>(148)  | 632<br>(551)   | 769<br>(439)   | 2791<br>(1471) |
| Lafayette    | 64     | 5546<br>(2571)   | 1942<br>(1143) | 237<br>(189)   | 1475<br>(1166) | 3603<br>(2511) | 230<br>(217)  | 968<br>(531)   | 1065<br>(502)  | 3399<br>(2245) |
| Lakeland     | 68     | 4171<br>(1821)   | 1460<br>(883)  | 687<br>(537)   | 591<br>(594)   | 2711<br>(1425) | 182<br>(137)  | 645<br>(492)   | 935<br>(480)   | 2512<br>(1508) |
| Lancaster    | 101    | 5404<br>(1889)   | 938<br>(932)   | 539<br>(655)   | 192<br>(245)   | 4466<br>(1994) | 207<br>(162)  | 544<br>(376)   | 895<br>(405)   | 3830<br>(1672) |
| Lancaster    | 74     | 4963<br>(2365)   | 3479<br>(1861) | 2369<br>(1464) | 760<br>(546)   | 1484<br>(1089) | 350<br>(283)  | 994<br>(663)   | 1166<br>(673)  | 2683<br>(1856) |
| Lansing      | 102    | 3603<br>(1439)   | 1008<br>(705)  | 263<br>(180)   | 372<br>(404)   | 2595<br>(1322) | 373<br>(363)  | 629<br>(573)   | 578<br>(342)   | 2209<br>(1402) |
| Laredo       | 60     | 4439<br>(2566)   | 4283<br>(2405) | 4237<br>(2333) | 12<br>(42)     | 156<br>(220)   | 34<br>(79)    | 1365<br>(747)  | 1172<br>(633)  | 1844<br>(1969) |
| Las Vegas    | 469    | 4387             | 2489           | 1364           | 482            | 1898           | 643           | 637            | 899            | 2803           |

**Supplementary Table 2.** City demographic summary statistics. Standard deviations in parentheses. People of color (POC) includes all who do not report as non-Hispanic white alone.

Continued on next page

– Continued from previous page

| City          | Tracts | People per tract |        |          |              |        |       |                |       |        |
|---------------|--------|------------------|--------|----------|--------------|--------|-------|----------------|-------|--------|
|               |        | Total            | POC    | Hispanic | Non-Hispanic |        |       | Poverty Status |       |        |
|               |        |                  |        |          | Black        | White  | Other | <1×            | 1-2×  | >2×    |
|               |        | (1757)           | (1323) | (953)    | (415)        | (1158) | (535) | (470)          | (529) | (1514) |
| Lexington     | 87     | 3894             | 1050   | 267      | 523          | 2844   | 260   | 666            | 634   | 2439   |
|               |        | (1538)           | (846)  | (367)    | (561)        | (1398) | (233) | (687)          | (380) | (1514) |
| Lincoln       | 72     | 4079             | 757    | 285      | 165          | 3322   | 307   | 562            | 666   | 2667   |
|               |        | (1656)           | (565)  | (262)    | (171)        | (1497) | (254) | (481)          | (481) | (1508) |
| Little Rock   | 120    | 4453             | 1697   | 252      | 1241         | 2756   | 204   | 671            | 860   | 2858   |
|               |        | (2079)           | (1275) | (267)    | (1145)       | (2058) | (197) | (490)          | (480) | (1736) |
| Los Angeles   | 2788   | 4557             | 3290   | 2130     | 292          | 1267   | 867   | 720            | 918   | 2850   |
|               |        | (1828)           | (1773) | (1563)   | (537)        | (1244) | (979) | (543)          | (608) | (1547) |
| Louisville    | 265    | 4117             | 1056   | 190      | 662          | 3061   | 204   | 537            | 673   | 2814   |
|               |        | (1604)           | (968)  | (206)    | (869)        | (1613) | (188) | (442)          | (400) | (1539) |
| Lubbock       | 63     | 4476             | 2051   | 1544     | 314          | 2425   | 193   | 820            | 884   | 2579   |
|               |        | (2282)           | (1417) | (1157)   | (414)        | (1633) | (183) | (618)          | (579) | (1802) |
| McAllen       | 111    | 7445             | 6948   | 6828     | 32           | 496    | 89    | 2341           | 1960  | 3045   |
|               |        | (3197)           | (3106) | (3074)   | (92)         | (480)  | (176) | (1512)         | (965) | (1903) |
| Madison       | 98     | 4831             | 1015   | 318      | 254          | 3816   | 442   | 614            | 574   | 3514   |
|               |        | (2246)           | (832)  | (392)    | (272)        | (1987) | (385) | (749)          | (412) | (2212) |
| Memphis       | 269    | 4264             | 2517   | 246      | 2092         | 1747   | 179   | 810            | 822   | 2557   |
|               |        | (2424)           | (1807) | (406)    | (1699)       | (1952) | (254) | (668)          | (533) | (2257) |
| Miami         | 1206   | 4961             | 3396   | 2199     | 992          | 1565   | 205   | 783            | 1069  | 3050   |
|               |        | (2358)           | (2418) | (2082)   | (1421)       | (1349) | (248) | (663)          | (740) | (1794) |
| Milwaukee     | 407    | 3615             | 1251   | 395      | 631          | 2364   | 225   | 535            | 578   | 2431   |
|               |        | (1518)           | (1068) | (613)    | (930)        | (1801) | (202) | (425)          | (337) | (1589) |
| Minneapolis   | 684    | 4328             | 1156   | 272      | 400          | 3173   | 484   | 421            | 566   | 3271   |
|               |        | (2081)           | (968)  | (303)    | (490)        | (1900) | (462) | (430)          | (398) | (1960) |
| Mission Viejo | 109    | 5230             | 1801   | 986      | 78           | 3429   | 737   | 337            | 490   | 4383   |
|               |        | (2002)           | (1089) | (859)    | (89)         | (1381) | (453) | (279)          | (432) | (1805) |
| Mobile        | 109    | 3605             | 1565   | 99       | 1313         | 2040   | 153   | 688            | 725   | 2105   |
|               |        | (2366)           | (928)  | (134)    | (921)        | (2179) | (186) | (405)          | (467) | (1857) |
| Modesto       | 76     | 5514             | 3097   | 2439     | 136          | 2417   | 521   | 944            | 1304  | 3210   |
|               |        | (2322)           | (1707) | (1375)   | (138)        | (1376) | (590) | (511)          | (633) | (1970) |
| Montgomery    | 77     | 3935             | 2149   | 136      | 1856         | 1786   | 157   | 737            | 748   | 2306   |
|               |        | (2230)           | (1461) | (241)    | (1395)       | (1914) | (224) | (631)          | (446) | (1688) |
| Murrieta      | 76     | 6474             | 3305   | 2182     | 334          | 3168   | 789   | 643            | 988   | 4795   |
|               |        | (2721)           | (1752) | (1195)   | (292)        | (1361) | (657) | (437)          | (543) | (2362) |
| Myrtle Beach  | 77     | 4225             | 921    | 255      | 523          | 3304   | 142   | 663            | 901   | 2604   |
|               |        | (2166)           | (809)  | (328)    | (616)        | (1773) | (135) | (552)          | (544) | (1478) |
| Nashua        | 51     | 5131             | 679    | 301      | 78           | 4452   | 301   | 328            | 527   | 4221   |
|               |        | (2001)           | (670)  | (463)    | (87)         | (1849) | (274) | (390)          | (428) | (1817) |
| Nashville     | 253    | 4575             | 1526   | 384      | 879          | 3049   | 263   | 578            | 734   | 3169   |
|               |        | (1975)           | (1236) | (438)    | (974)        | (1795) | (248) | (483)          | (533) | (1796) |
| New Haven     | 151    | 4590             | 1462   | 627      | 543          | 3129   | 292   | 441            | 556   | 3427   |
|               |        | (1794)           | (1358) | (746)    | (796)        | (1837) | (235) | (441)          | (408) | (1686) |
| New Orleans   | 342    | 2854             | 1573   | 278      | 1146         | 1281   | 149   | 555            | 536   | 1709   |
|               |        | (1654)           | (1317) | (372)    | (1170)       | (1179) | (234) | (446)          | (378) | (1247) |
| New York      | 4469   | 4316             | 2341   | 1057     | 694          | 1975   | 590   | 592            | 647   | 3002   |
|               |        | (2061)           | (1874) | (1237)   | (1058)       | (1778) | (762) | (639)          | (554) | (1715) |
| Norwich       | 66     | 4074             | 969    | 412      | 212          | 3105   | 345   | 398            | 523   | 2969   |
|               |        | (1624)           | (889)  | (496)    | (281)        | (1415) | (282) | (402)          | (385) | (1388) |
| Ogden         | 110    | 5448             | 995    | 684      | 61           | 4454   | 249   | 470            | 867   | 4062   |
|               |        | (2543)           | (667)  | (598)    | (75)         | (2373) | (172) | (333)          | (476) | (2371) |
| Oklahoma City | 291    | 3478             | 1351   | 515      | 423          | 2128   | 413   | 503            | 655   | 2259   |
|               |        | (1961)           | (880)  | (642)    | (507)        | (1623) | (307) | (437)          | (453) | (1731) |
| Omaha         | 225    | 3607             | 917    | 398      | 302          | 2689   | 218   | 407            | 579   | 2546   |
|               |        | (1357)           | (798)  | (574)    | (450)        | (1368) | (186) | (355)          | (389) | (1378) |
| Orlando       | 299    | 5966             | 3058   | 1564     | 1032         | 2908   | 462   | 890            | 1201  | 3750   |
|               |        | (4063)           | (2464) | (1506)   | (1273)       | (2412) | (522) | (700)          | (921) | (3151) |

**Supplementary Table 2.** City demographic summary statistics. Standard deviations in parentheses. People of color (POC) includes all who do not report as non-Hispanic white alone.

Continued on next page

– Continued from previous page

| City             | Tracts | People per tract |                |                |                |                |              |                |               |                |
|------------------|--------|------------------|----------------|----------------|----------------|----------------|--------------|----------------|---------------|----------------|
|                  |        | Total            | POC            | Hispanic       | Non-Hispanic   |                |              | Poverty Status |               |                |
|                  |        |                  |                |                | Black          | White          | Other        | <1×            | 1-2×          | >2×            |
| Oxnard           | 83     | 5028<br>(2488)   | 3363<br>(2421) | 2843<br>(2169) | 102<br>(121)   | 1666<br>(1395) | 418<br>(432) | 665<br>(529)   | 1068<br>(731) | 3226<br>(1922) |
| Palm Bay         | 95     | 5192<br>(2849)   | 1318<br>(1186) | 539<br>(510)   | 500<br>(657)   | 3874<br>(2084) | 279<br>(253) | 663<br>(527)   | 997<br>(746)  | 3469<br>(2080) |
| Palm Coast       | 92     | 4378<br>(1975)   | 993<br>(950)   | 307<br>(279)   | 480<br>(740)   | 3385<br>(1684) | 206<br>(194) | 673<br>(456)   | 914<br>(514)  | 2730<br>(1501) |
| Pensacola        | 85     | 4742<br>(2112)   | 1458<br>(890)  | 253<br>(233)   | 841<br>(745)   | 3285<br>(1904) | 364<br>(285) | 636<br>(408)   | 876<br>(483)  | 2958<br>(1734) |
| Peoria           | 75     | 4113<br>(1771)   | 836<br>(820)   | 150<br>(140)   | 454<br>(633)   | 3277<br>(1857) | 233<br>(311) | 514<br>(343)   | 670<br>(352)  | 2815<br>(1697) |
| Philadelphia     | 1410   | 4137<br>(1754)   | 1570<br>(1487) | 377<br>(632)   | 853<br>(1171)  | 2567<br>(1726) | 341<br>(377) | 534<br>(589)   | 573<br>(451)  | 2933<br>(1598) |
| Phoenix          | 893    | 4562<br>(1941)   | 1956<br>(1587) | 1362<br>(1364) | 222<br>(263)   | 2606<br>(1611) | 371<br>(386) | 716<br>(670)   | 841<br>(607)  | 2956<br>(1637) |
| Pittsburgh       | 599    | 3282<br>(1715)   | 516<br>(543)   | 56<br>(60)     | 297<br>(463)   | 2766<br>(1737) | 163<br>(208) | 361<br>(289)   | 471<br>(263)  | 2371<br>(1599) |
| Portland         | 63     | 4390<br>(1704)   | 439<br>(374)   | 96<br>(103)    | 136<br>(206)   | 3951<br>(1631) | 206<br>(162) | 466<br>(337)   | 588<br>(375)  | 3221<br>(1551) |
| Portland         | 431    | 4863<br>(1845)   | 1322<br>(930)  | 578<br>(545)   | 148<br>(212)   | 3541<br>(1350) | 596<br>(535) | 594<br>(474)   | 753<br>(481)  | 3453<br>(1535) |
| Port St. Lucie   | 68     | 6056<br>(4129)   | 2116<br>(2336) | 990<br>(1149)  | 910<br>(1213)  | 3941<br>(2561) | 215<br>(276) | 881<br>(730)   | 1249<br>(942) | 3863<br>(3007) |
| Poughkeepsie     | 119    | 4489<br>(1586)   | 1385<br>(953)  | 710<br>(581)   | 420<br>(461)   | 3104<br>(1534) | 256<br>(198) | 490<br>(612)   | 562<br>(401)  | 3227<br>(1528) |
| Providence       | 281    | 4414<br>(1653)   | 1114<br>(1254) | 595<br>(915)   | 229<br>(295)   | 3301<br>(1768) | 290<br>(241) | 569<br>(468)   | 665<br>(433)  | 3029<br>(1551) |
| Provo            | 123    | 4515<br>(1885)   | 771<br>(571)   | 511<br>(447)   | 23<br>(36)     | 3743<br>(1643) | 237<br>(177) | 523<br>(569)   | 848<br>(497)  | 3029<br>(1648) |
| Raleigh          | 206    | 5575<br>(2820)   | 2117<br>(1922) | 550<br>(581)   | 1076<br>(1340) | 3458<br>(1956) | 491<br>(620) | 547<br>(538)   | 787<br>(685)  | 4131<br>(2349) |
| Reading          | 68     | 4405<br>(2116)   | 1489<br>(1088) | 1144<br>(987)  | 205<br>(182)   | 2916<br>(2434) | 140<br>(128) | 689<br>(544)   | 770<br>(359)  | 2833<br>(2203) |
| Reno             | 105    | 4172<br>(1564)   | 1511<br>(1011) | 1000<br>(834)  | 90<br>(95)     | 2661<br>(1240) | 421<br>(280) | 550<br>(442)   | 794<br>(538)  | 2778<br>(1350) |
| Richmond         | 255    | 4306<br>(1992)   | 1905<br>(1460) | 274<br>(367)   | 1317<br>(1273) | 2401<br>(1682) | 314<br>(426) | 540<br>(508)   | 620<br>(429)  | 3044<br>(1904) |
| Riverside        | 370    | 5528<br>(2429)   | 4080<br>(2093) | 3121<br>(1720) | 450<br>(423)   | 1448<br>(1210) | 508<br>(584) | 956<br>(691)   | 1212<br>(679) | 3251<br>(2110) |
| Roanoke          | 56     | 4624<br>(1504)   | 1058<br>(1091) | 185<br>(197)   | 644<br>(960)   | 3566<br>(1581) | 230<br>(231) | 617<br>(502)   | 821<br>(378)  | 3059<br>(1356) |
| Rochester        | 206    | 3940<br>(1822)   | 1073<br>(816)  | 309<br>(298)   | 531<br>(566)   | 2867<br>(2010) | 233<br>(265) | 536<br>(386)   | 592<br>(322)  | 2704<br>(1815) |
| Rockford         | 76     | 3922<br>(2038)   | 1263<br>(813)  | 586<br>(541)   | 477<br>(480)   | 2660<br>(1886) | 199<br>(141) | 611<br>(424)   | 820<br>(488)  | 2423<br>(1841) |
| Round Lake Beach | 57     | 5267<br>(1699)   | 1187<br>(1019) | 786<br>(825)   | 117<br>(135)   | 4079<br>(1580) | 284<br>(282) | 421<br>(231)   | 705<br>(437)  | 4120<br>(1437) |
| Sacramento       | 396    | 4813<br>(1932)   | 2344<br>(1675) | 995<br>(705)   | 378<br>(415)   | 2470<br>(1359) | 970<br>(879) | 703<br>(583)   | 821<br>(589)  | 3231<br>(1667) |
| St. Louis        | 510    | 4499<br>(1893)   | 1357<br>(1272) | 141<br>(176)   | 973<br>(1259)  | 3142<br>(2123) | 243<br>(235) | 544<br>(444)   | 667<br>(420)  | 3194<br>(1799) |
| Salem            | 45     | 5920<br>(2345)   | 1946<br>(1461) | 1418<br>(1210) | 74<br>(107)    | 3973<br>(1802) | 455<br>(283) | 899<br>(616)   | 1308<br>(767) | 3513<br>(1832) |
| Salt Lake City   | 213    | 5233<br>(2730)   | 1465<br>(1213) | 938<br>(931)   | 86<br>(133)    | 3768<br>(2289) | 440<br>(334) | 541<br>(451)   | 887<br>(600)  | 3738<br>(2388) |
| San Antonio      | 397    | 5253<br>(2269)   | 3586<br>(1830) | 2975<br>(1693) | 361<br>(443)   | 1667<br>(1450) | 250<br>(292) | 798<br>(580)   | 1068<br>(702) | 3296<br>(2034) |
| San Diego        | 610    | 5251             | 2849           | 1763           | 252            | 2402           | 834          | 686            | 890           | 3545           |

**Supplementary Table 2.** City demographic summary statistics. Standard deviations in parentheses. People of color (POC) includes all who do not report as non-Hispanic white alone.

Continued on next page

– Continued from previous page

| City             | Tracts | People per tract |        |          |              |        |        |                |       |        |
|------------------|--------|------------------|--------|----------|--------------|--------|--------|----------------|-------|--------|
|                  |        | Total            | POC    | Hispanic | Non-Hispanic |        |        | Poverty Status |       |        |
|                  |        |                  |        |          | Black        | White  | Other  | <1×            | 1-2×  | >2×    |
|                  |        | (2890)           | (2194) | (1541)   | (347)        | (1850) | (1012) | (562)          | (755) | (2172) |
| San Francisco    | 789    | 4526             | 2863   | 1008     | 348          | 1663   | 1507   | 484            | 594   | 3377   |
|                  |        | (1767)           | (1731) | (1025)   | (467)        | (1164) | (1187) | (428)          | (490) | (1528) |
| San Jose         | 337    | 5183             | 3533   | 1294     | 127          | 1650   | 2112   | 439            | 595   | 4073   |
|                  |        | (1669)           | (1681) | (1120)   | (123)        | (1108) | (1349) | (351)          | (487) | (1501) |
| Santa Clarita    | 61     | 4434             | 2293   | 1406     | 182          | 2140   | 705    | 357            | 486   | 3460   |
|                  |        | (1980)           | (1436) | (1150)   | (191)        | (1062) | (492)  | (410)          | (519) | (1662) |
| Santa Rosa       | 67     | 5364             | 2095   | 1522     | 89           | 3270   | 483    | 583            | 878   | 3828   |
|                  |        | (2081)           | (1569) | (1266)   | (107)        | (1257) | (332)  | (379)          | (628) | (1531) |
| Sarasota         | 174    | 4249             | 914    | 520      | 254          | 3335   | 139    | 492            | 761   | 2940   |
|                  |        | (1835)           | (1007) | (597)    | (503)        | (1658) | (129)  | (424)          | (454) | (1549) |
| Savannah         | 78     | 4189             | 1998   | 267      | 1511         | 2191   | 220    | 656            | 714   | 2650   |
|                  |        | (3446)           | (1793) | (387)    | (1378)       | (2261) | (293)  | (429)          | (497) | (2927) |
| Scranton         | 138    | 3217             | 422    | 196      | 112          | 2795   | 114    | 476            | 577   | 2029   |
|                  |        | (1334)           | (436)  | (225)    | (179)        | (1334) | (145)  | (314)          | (275) | (1114) |
| Seattle          | 660    | 5217             | 1906   | 516      | 301          | 3311   | 1089   | 541            | 667   | 3930   |
|                  |        | (1678)           | (1171) | (440)    | (367)        | (1323) | (736)  | (421)          | (459) | (1543) |
| Shreveport       | 80     | 4443             | 2131   | 185      | 1779         | 2312   | 167    | 913            | 883   | 2547   |
|                  |        | (2617)           | (1517) | (229)    | (1498)       | (2423) | (168)  | (653)          | (522) | (2197) |
| South Bend       | 83     | 3552             | 953    | 289      | 464          | 2599   | 200    | 615            | 696   | 2093   |
|                  |        | (1847)           | (612)  | (319)    | (376)        | (1769) | (194)  | (384)          | (375) | (1546) |
| Spokane          | 97     | 4661             | 703    | 251      | 76           | 3958   | 376    | 676            | 884   | 2971   |
|                  |        | (2013)           | (452)  | (158)    | (96)         | (1815) | (277)  | (459)          | (468) | (1741) |
| Springfield      | 163    | 4519             | 1332   | 792      | 303          | 3187   | 237    | 631            | 672   | 2937   |
|                  |        | (1864)           | (1230) | (905)    | (456)        | (1915) | (255)  | (594)          | (473) | (1654) |
| Springfield      | 71     | 4764             | 531    | 166      | 136          | 4233   | 230    | 797            | 992   | 2803   |
|                  |        | (1760)           | (326)  | (125)    | (152)        | (1666) | (171)  | (467)          | (403) | (1701) |
| Stockton         | 84     | 4988             | 3769   | 2206     | 450          | 1219   | 1114   | 1030           | 1189  | 2663   |
|                  |        | (3026)           | (2429) | (1221)   | (370)        | (1010) | (1413) | (524)          | (661) | (2486) |
| Syracuse         | 141    | 3436             | 762    | 155      | 357          | 2674   | 250    | 506            | 515   | 2280   |
|                  |        | (1471)           | (643)  | (142)    | (448)        | (1627) | (264)  | (394)          | (274) | (1465) |
| Tallahassee      | 71     | 4224             | 1835   | 254      | 1336         | 2389   | 246    | 821            | 730   | 2494   |
|                  |        | (1939)           | (1040) | (204)    | (936)        | (1577) | (227)  | (922)          | (468) | (1867) |
| Tampa            | 655    | 4074             | 1526   | 778      | 493          | 2547   | 256    | 582            | 800   | 2630   |
|                  |        | (1854)           | (1324) | (824)    | (692)        | (1346) | (274)  | (451)          | (512) | (1513) |
| Toledo           | 156    | 3653             | 923    | 223      | 532          | 2730   | 168    | 600            | 637   | 2343   |
|                  |        | (1776)           | (682)  | (193)    | (569)        | (1829) | (153)  | (425)          | (346) | (1696) |
| Trenton          | 63     | 4318             | 2194   | 820      | 1095         | 2124   | 279    | 558            | 687   | 2882   |
|                  |        | (1729)           | (1301) | (788)    | (962)        | (1810) | (285)  | (440)          | (471) | (1712) |
| Tucson           | 213    | 4187             | 2012   | 1574     | 135          | 2175   | 303    | 776            | 863   | 2436   |
|                  |        | (1787)           | (1489) | (1393)   | (157)        | (1362) | (267)  | (641)          | (584) | (1382) |
| Tulsa            | 212    | 3640             | 1290   | 403      | 331          | 2350   | 556    | 522            | 684   | 2381   |
|                  |        | (1862)           | (929)  | (508)    | (498)        | (1495) | (365)  | (412)          | (434) | (1612) |
| Victorville      | 51     | 7174             | 4669   | 3557     | 718          | 2505   | 395    | 1569           | 1624  | 3794   |
|                  |        | (3752)           | (3248) | (2294)   | (734)        | (1361) | (419)  | (1009)         | (836) | (2875) |
| Virginia Beach   | 375    | 4044             | 1895   | 272      | 1294         | 2148   | 330    | 485            | 625   | 2766   |
|                  |        | (2036)           | (1294) | (264)    | (1083)       | (1546) | (290)  | (402)          | (414) | (1698) |
| Visalia          | 43     | 5877             | 3683   | 3223     | 111          | 2193   | 350    | 1269           | 1391  | 3131   |
|                  |        | (3486)           | (2412) | (2054)   | (103)        | (1576) | (416)  | (986)          | (645) | (2579) |
| Washington, D.C. | 1150   | 4512             | 2582   | 748      | 1168         | 1930   | 666    | 370            | 490   | 3574   |
|                  |        | (1827)           | (1573) | (816)    | (1244)       | (1411) | (650)  | (348)          | (438) | (1640) |
| Wichita          | 124    | 4211             | 1308   | 588      | 363          | 2903   | 356    | 600            | 792   | 2763   |
|                  |        | (2229)           | (942)  | (554)    | (492)        | (2079) | (368)  | (420)          | (476) | (2095) |
| Wilmington       | 55     | 5009             | 1127   | 271      | 670          | 3882   | 187    | 850            | 802   | 3229   |
|                  |        | (2636)           | (824)  | (275)    | (657)        | (2316) | (171)  | (658)          | (575) | (2013) |
| Winston          | 118    | 4199             | 1511   | 456      | 877          | 2688   | 178    | 712            | 801   | 2584   |
|                  |        | (1611)           | (1218) | (442)    | (883)        | (1632) | (183)  | (538)          | (469) | (1466) |

**Supplementary Table 2.** City demographic summary statistics. Standard deviations in parentheses. People of color (POC) includes all who do not report as non-Hispanic white alone.

Continued on next page

| City         | Tracts | People per tract |                |              |              |                |              |                |               |                |
|--------------|--------|------------------|----------------|--------------|--------------|----------------|--------------|----------------|---------------|----------------|
|              |        | Total            | POC            | Hispanic     | Non-Hispanic |                |              | Poverty Status |               |                |
|              |        |                  |                |              | Black        | White          | Other        | <1×            | 1-2×          | >2×            |
| Winter Haven | 64     | 4199<br>(1945)   | 1650<br>(1274) | 870<br>(835) | 662<br>(736) | 2549<br>(1275) | 118<br>(102) | 824<br>(543)   | 1042<br>(560) | 2294<br>(1271) |
| Worcester    | 118    | 4758<br>(1928)   | 1136<br>(979)  | 523<br>(599) | 246<br>(280) | 3622<br>(1920) | 367<br>(429) | 535<br>(507)   | 615<br>(382)  | 3432<br>(1873) |
| York         | 56     | 4865<br>(2262)   | 1031<br>(741)  | 452<br>(414) | 371<br>(305) | 3834<br>(2328) | 209<br>(176) | 570<br>(415)   | 794<br>(450)  | 3346<br>(2061) |
| Youngstown   | 131    | 3407<br>(1670)   | 663<br>(635)   | 129<br>(158) | 424<br>(522) | 2743<br>(1791) | 110<br>(93)  | 589<br>(394)   | 644<br>(312)  | 2087<br>(1517) |

**Supplementary Table 2.** City demographic summary statistics. Standard deviations in parentheses. People of color (POC) includes all who do not report as non-Hispanic white alone.

## Supplementary Note 1

As discussed in detail in Sheriff and Maguire (8), the KP inequality index has several properties that make it more useful in the context of SUHI evaluation than the Atkinson inequality index. The KP index allows the outcome variable to take negative values. This feature makes it well-suited for examining distributions of SUHI intensity, since, unlike other environmental stressors (e.g., air pollution), the SUHI can have negative values at the local scale. That is, a census tract can be cooler than its city’s rural reference.

Moreover, unlike the Atkinson index the KP index is insensitive to an additive shift in all outcomes by the same constant. This feature implies that ranking of heat for demographic groups within a given urbanized area is insensitive to whether it is measured in raw temperatures or SUHI intensity (raw temperature minus a common rural reference).

The inequality aversion parameter  $\kappa$  in Eq. (2) reflects the non-linearity of damages caused by summer heat exposure. Specifically, the elasticity of marginal utility to a change in SUHI is  $\kappa x_n$ . A lower value of  $\kappa$  corresponds to a higher marginal damage of  $x$ , and a higher inequality index value for a given unequal distribution. At the limit as  $\kappa$  approaches zero, the KP index approaches zero and the EDE approaches the mean.

Apart from  $\kappa$ , Eq. (2) reflects several assumptions about the agent’s preferences: (i) all else equal, increasing any  $x_n$  is undesirable; (ii) preferences across  $x_n$  are Schur-concave, i.e., all else equal, shifting an amount  $\Delta$  UHI from an individual  $x_i$  to  $x_j$  is desirable if  $x_i - x_j > \Delta$ ;<sup>1</sup> and (iii) preferences are *translation invariant* (1), i.e., a ranking of lotteries will not change if every outcome in each lottery is shifted by an additive constant. The first two assumptions are fairly uncontroversial.

Translation invariance, however, represents an important distinction from the Atkinson inequality index which assumes scale invariance (lottery rankings do not change if each outcome is multiplied by a positive constant). Scale invariance is a convenient property for comparing income distributions in different points of time or space since it eliminates the need for adjusting for inflation or exchange rates. It is less justifiable for evaluating distributions

<sup>1</sup>Formally, let  $\mathbf{Q}$  be a square matrix composed of non-negative real numbers whose rows and columns each sum to 1. The function  $f(\mathbf{x})$  is Schur concave if  $\mathbf{Q}\mathbf{x}$  is not a permutation of  $\mathbf{x}$  and  $f(\mathbf{Q}\mathbf{x}) \geq f(\mathbf{x})$ . All symmetric quasiconcave functions are Schur concave, although the converse is not true (5).

of environmental inequality, however. Doubling all SUHI exposures, for example, would double the gap in exposures between any two individuals yet would not change the inequality measured by the Atkinson index.

In general, distributional rankings may be sensitive to the elasticity of marginal utility specified by the value of the inequality aversion parameter. Since there is not a consensus regarding the “right” value, the literature typically presents results for a range of values. In the context of income distribution, the U.S. Census Bureau has reported results with elasticities of 0.25, 0.5, and 0.75 (7, 6). For environmental outcomes (3) evaluated elasticities ranging from 0.25 to 2.0 in their study of the distribution of outdoor NO<sub>2</sub> and Cropper et al. (4) estimated a mean value of 0.72.

These studies use Atkinson inequality measures for which the elasticity is a constant. For KP measures, however, this elasticity,  $\kappa x_n$ , is a function of  $x$ . To present results for a range of  $\kappa$  that generates elasticities comparable to those in the above-cited literature, we first identify a value of  $\kappa$  that is consistent with a given constant elasticity  $\beta$ . To establish a correspondence between an elasticity  $\beta$  and a vector of elasticities  $\kappa \mathbf{x}$ , we use the approach of Sheriff and Maguire (8), choosing the value of  $\kappa$  that minimizes the sum of squared differences between the individual elasticities and  $\beta$ :

$$\begin{aligned} \kappa(\beta) &= -\arg \min_{\hat{\kappa}} \{[\hat{\kappa} \mathbf{x} - \beta \mathbf{1}]'[\hat{\kappa} \mathbf{x} - \beta \mathbf{1}]\} \\ (1) \quad &= -\frac{\beta \sum_{n=1}^N x_n}{\sum_{n=1}^N x_n^2}. \end{aligned}$$

We use  $\kappa(0.50)$ , representing “moderate” inequality aversion to calculate the main KP index results presented in Table 2. Tables 3–5 display present EDE results for low ( $\kappa(0.25)$ ), moderate ( $\kappa(0.50)$ ), and high ( $\kappa(0.75)$ ) levels of inequality aversion. Although EDE and index magnitudes vary with different inequality aversion parameter values, the qualitative results remain largely unchanged.

|                                               | Climate zone        |                     |                     |                    |                     |
|-----------------------------------------------|---------------------|---------------------|---------------------|--------------------|---------------------|
|                                               | Arid                | Snow                | Temperate           | Equatorial         | Total               |
| <i>a. Population-weighted EDE means</i>       |                     |                     |                     |                    |                     |
| Total                                         | 0.46<br>(0.45)      | 2.37<br>(0.89)      | 2.36<br>(1.23)      | 2.87<br>(0.43)     | 2.20<br>(1.23)      |
| By race/ethnicity <sup>a</sup>                |                     |                     |                     |                    |                     |
| People of color                               | 0.70<br>(0.51)      | 3.56<br>(1.06)      | 3.07<br>(1.45)      | 3.29<br>(0.35)     | 2.89<br>(1.51)      |
| Hispanic                                      | 0.79<br>(0.52)      | 3.77<br>(1.26)      | 3.15<br>(1.48)      | 3.13<br>(0.35)     | 2.81<br>(1.60)      |
| Non-Hispanic                                  |                     |                     |                     |                    |                     |
| Black                                         | 0.78<br>(0.65)      | 3.81<br>(0.99)      | 3.16<br>(1.62)      | 3.82<br>(0.35)     | 3.23<br>(1.55)      |
| White                                         | 0.18<br>(0.45)      | 1.80<br>(0.74)      | 1.69<br>(0.98)      | 2.02<br>(0.24)     | 1.61<br>(0.97)      |
| Other                                         | 0.28<br>(0.47)      | 2.81<br>(1.02)      | 2.77<br>(1.31)      | 2.44<br>(0.17)     | 2.56<br>(1.39)      |
| By income                                     |                     |                     |                     |                    |                     |
| Below poverty                                 | 0.80<br>(0.51)      | 3.45<br>(1.09)      | 3.06<br>(1.46)      | 3.51<br>(0.45)     | 2.90<br>(1.50)      |
| Above 2 × poverty                             | 0.29<br>(0.46)      | 2.01<br>(0.86)      | 2.11<br>(1.19)      | 2.52<br>(0.36)     | 1.94<br>(1.18)      |
| <i>b. Difference in mean EDE values</i>       |                     |                     |                     |                    |                     |
| People of color – Non-Hisp. white             | 0.52***<br>(0.172)  | 1.76***<br>(0.272)  | 1.38***<br>(0.465)  | 1.27**<br>(0.137)  | 1.28***<br>(0.355)  |
| Below poverty – 2 × poverty                   | 0.51***<br>(0.162)  | 1.44***<br>(0.304)  | 0.95*<br>(0.489)    | 0.99**<br>(0.181)  | 0.96***<br>(0.363)  |
| People of color – below poverty               | -0.10<br>(0.166)    | 0.12<br>(0.297)     | 0.01<br>(0.553)     | -0.22<br>(0.151)   | -0.01<br>(0.419)    |
| Non-Hisp. white – below poverty               | -0.61***<br>(0.167) | -1.64***<br>(0.267) | -1.37***<br>(0.434) | -1.49**<br>(0.166) | -1.29***<br>(0.318) |
| <i>c. Proportion of urban areas for which</i> |                     |                     |                     |                    |                     |
| People of color > Non-Hisp. white             | 0.84                | 0.98                | 0.98                | 1.00               | 0.97                |
| Below poverty > 2 × poverty                   | 0.79                | 0.93                | 0.97                | 1.00               | 0.94                |
| People of color > below poverty               | 0.42                | 0.61                | 0.42                | 0.00               | 0.46                |
| Non-Hisp. white > below poverty               | 0.16                | 0.05                | 0.01                | 0.00               | 0.03                |

**Supplementary Table 3.** Low inequality aversion equally distributed equivalent (EDE) summer daytime surface urban heat island intensity by climate. People of color refers to all individuals who do not report as non-Hispanic white alone. Panel a: Population-weighted mean of urban area Kolm-Pollak EDEs in °C. Standard deviation in parentheses. Panel b: Robust standard errors in parentheses. <sup>a</sup>People of color includes all who do not identify as non-Hispanic white alone. Hispanic includes all reporting this ethnicity, regardless of race. Black and white include all non-Hispanics identifying as these races alone. Other includes all other races alone and more than one race. \* $p < 0.10$ , \*\* $p < 0.05$ , \*\*\* $p < 0.01$ .

Source: Author calculations, based on data from American Community Survey and (2).

|                                               | Climate zone        |                     |                     |                    |                     |
|-----------------------------------------------|---------------------|---------------------|---------------------|--------------------|---------------------|
|                                               | Arid                | Snow                | Temperate           | Equatorial         | Total               |
| <i>a. Population-weighted EDE means</i>       |                     |                     |                     |                    |                     |
| Total                                         | 0.52<br>(0.45)      | 2.52<br>(0.93)      | 2.50<br>(1.27)      | 2.96<br>(0.45)     | 2.33<br>(1.27)      |
| By race/ethnicity                             |                     |                     |                     |                    |                     |
| People of color                               | 0.75<br>(0.51)      | 3.68<br>(1.09)      | 3.18<br>(1.48)      | 3.38<br>(0.36)     | 3.00<br>(1.54)      |
| Hispanic                                      | 0.83<br>(0.52)      | 3.90<br>(1.30)      | 3.25<br>(1.51)      | 3.22<br>(0.36)     | 2.90<br>(1.63)      |
| Non-Hispanic                                  |                     |                     |                     |                    |                     |
| Black                                         | 0.83<br>(0.66)      | 3.90<br>(1.00)      | 3.27<br>(1.63)      | 3.89<br>(0.35)     | 3.33<br>(1.57)      |
| White                                         | 0.25<br>(0.44)      | 1.94<br>(0.78)      | 1.82<br>(1.01)      | 2.11<br>(0.25)     | 1.74<br>(1.01)      |
| Other                                         | 0.34<br>(0.46)      | 2.93<br>(1.06)      | 2.90<br>(1.32)      | 2.54<br>(0.18)     | 2.68<br>(1.42)      |
| By income                                     |                     |                     |                     |                    |                     |
| Below poverty                                 | 0.84<br>(0.52)      | 3.57<br>(1.13)      | 3.17<br>(1.49)      | 3.59<br>(0.46)     | 3.01<br>(1.53)      |
| Above 2 × poverty                             | 0.35<br>(0.45)      | 2.15<br>(0.90)      | 2.24<br>(1.23)      | 2.62<br>(0.38)     | 2.07<br>(1.22)      |
| <i>b. Difference in mean EDE values</i>       |                     |                     |                     |                    |                     |
| People of color – Non-Hisp. white             | 0.50***<br>(0.165)  | 1.74***<br>(0.283)  | 1.36***<br>(0.473)  | 1.27**<br>(0.145)  | 1.26***<br>(0.362)  |
| Below poverty – 2 × poverty                   | 0.49***<br>(0.159)  | 1.42***<br>(0.314)  | 0.93*<br>(0.498)    | 0.97**<br>(0.188)  | 0.94**<br>(0.370)   |
| People of color – below poverty               | -0.10<br>(0.165)    | 0.11<br>(0.306)     | 0.01<br>(0.558)     | -0.21<br>(0.154)   | -0.01<br>(0.424)    |
| Non-Hisp. white – below poverty               | -0.60***<br>(0.161) | -1.63***<br>(0.277) | -1.35***<br>(0.441) | -1.48**<br>(0.174) | -1.27***<br>(0.324) |
| <i>c. Proportion of urban areas for which</i> |                     |                     |                     |                    |                     |
| People of color > Non-Hisp. white             | 0.84                | 0.98                | 0.97                | 1.00               | 0.96                |
| Below poverty > 2 × poverty                   | 0.79                | 0.93                | 0.98                | 1.00               | 0.95                |
| People of color > below poverty               | 0.42                | 0.57                | 0.41                | 0.00               | 0.45                |
| Non-Hisp. white > below poverty               | 0.16                | 0.05                | 0.01                | 0.00               | 0.03                |

**Supplementary Table 4.** Moderate inequality aversion equally distributed equivalent (EDE) summer daytime surface urban heat island intensity by climate. People of color refers to all individuals who do not report as non-Hispanic white alone. Panel a: Population-weighted mean of urban area Kolm-Pollak EDEs in °C. Standard deviation in parentheses. Panel b: Robust standard errors in parentheses. <sup>a</sup>People of color includes all who do not identify as non-Hispanic white alone. Hispanic includes all reporting this ethnicity, regardless of race. Black and white include all non-Hispanics identifying as these races alone. Other includes all other races alone and more than one race. \* $p < 0.10$ , \*\* $p < 0.05$ , \*\*\* $p < 0.01$ .

*Source:* Author calculations, based on data from American Community Survey and (2).



|                                               | Climate zone        |                     |                     |                    |                     |
|-----------------------------------------------|---------------------|---------------------|---------------------|--------------------|---------------------|
|                                               | Arid                | Snow                | Temperate           | Equatorial         | Total               |
| <i>a. Population-weighted EDE means</i>       |                     |                     |                     |                    |                     |
| Total                                         | 0.58<br>(0.45)      | 2.66<br>(0.98)      | 2.63<br>(1.31)      | 3.06<br>(0.46)     | 2.46<br>(1.31)      |
| By race/ethnicity                             |                     |                     |                     |                    |                     |
| People of color                               | 0.80<br>(0.51)      | 3.79<br>(1.12)      | 3.29<br>(1.50)      | 3.47<br>(0.37)     | 3.10<br>(1.57)      |
| Hispanic                                      | 0.88<br>(0.52)      | 4.01<br>(1.33)      | 3.35<br>(1.54)      | 3.31<br>(0.37)     | 2.99<br>(1.66)      |
| Non-Hispanic                                  |                     |                     |                     |                    |                     |
| Black                                         | 0.87<br>(0.67)      | 3.99<br>(1.01)      | 3.37<br>(1.65)      | 3.96<br>(0.35)     | 3.43<br>(1.58)      |
| White                                         | 0.32<br>(0.44)      | 2.08<br>(0.83)      | 1.96<br>(1.05)      | 2.19<br>(0.27)     | 1.86<br>(1.05)      |
| Other                                         | 0.40<br>(0.46)      | 3.06<br>(1.11)      | 3.03<br>(1.34)      | 2.63<br>(0.19)     | 2.81<br>(1.45)      |
| By income                                     |                     |                     |                     |                    |                     |
| Below poverty                                 | 0.89<br>(0.52)      | 3.69<br>(1.16)      | 3.29<br>(1.52)      | 3.66<br>(0.47)     | 3.11<br>(1.57)      |
| Above 2 × poverty                             | 0.41<br>(0.45)      | 2.28<br>(0.94)      | 2.37<br>(1.27)      | 2.72<br>(0.40)     | 2.19<br>(1.26)      |
| <i>b. Difference in mean EDE values</i>       |                     |                     |                     |                    |                     |
| People of color – Non-Hisp. white             | 0.48***<br>(0.162)  | 1.71***<br>(0.295)  | 1.34***<br>(0.479)  | 1.27**<br>(0.153)  | 1.24***<br>(0.368)  |
| Below poverty – 2 × poverty                   | 0.48***<br>(0.159)  | 1.40***<br>(0.324)  | 0.92*<br>(0.505)    | 0.95**<br>(0.194)  | 0.92**<br>(0.377)   |
| People of color – below poverty               | -0.10<br>(0.167)    | 0.10<br>(0.315)     | 0.00<br>(0.562)     | -0.20<br>(0.157)   | -0.01<br>(0.428)    |
| Non-Hisp. white – below poverty               | -0.58***<br>(0.159) | -1.61***<br>(0.287) | -1.33***<br>(0.447) | -1.47**<br>(0.181) | -1.25***<br>(0.330) |
| <i>c. Proportion of urban areas for which</i> |                     |                     |                     |                    |                     |
| People of color > Non-Hisp. white             | 0.84                | 0.98                | 0.97                | 1.00               | 0.96                |
| Below poverty > 2 × poverty                   | 0.79                | 0.93                | 0.98                | 1.00               | 0.95                |
| People of color > below poverty               | 0.42                | 0.55                | 0.42                | 0.00               | 0.45                |
| Non-Hisp. white > below poverty               | 0.16                | 0.05                | 0.01                | 0.00               | 0.03                |

**Supplementary Table 5.** High inequality aversion equally distributed equivalent (EDE) summer daytime surface urban heat island intensity by climate. People of color refers to all individuals who do not report as non-Hispanic white alone. Panel a: Population-weighted mean of urban area Kolm-Pollak EDEs in °C. Standard deviation in parentheses. Panel b: Robust standard errors in parentheses. <sup>a</sup>People of color includes all who do not identify as non-Hispanic white alone. Hispanic includes all reporting this ethnicity, regardless of race. Black and white include all non-Hispanics identifying as these races alone. Other includes all other races alone and more than one race. \* $p < 0.10$ , \*\* $p < 0.05$ , \*\*\* $p < 0.01$ .

*Source:* Author calculations, based on data from American Community Survey and Chakraborty et al. (2).

## Supplementary References

- [1] Charles Blackorby and David Donaldson. A theoretical treatment of indices of absolute inequality. *International Economic Review*, 21(1):107–136, February 1980.
- [2] T Chakraborty, A Hsu, D Manya, and G Sheriff. A spatially explicit surface urban heat island database for the United States: Characterization, uncertainties, and possible applications. *ISPRS Journal of Photogrammetry and Remote Sensing*, 168:74–88, 2020.
- [3] Lara P Clark, Dylan B Millet, and Julian D Marshall. National patterns in environmental injustice and inequality: Outdoor NO<sub>2</sub> air pollution in the United States. *PloS one*, 9(4):e94431, 2014.
- [4] Maureen Cropper, Alan Krupnick, and William Reich. Preferences for equality in environmental outcomes. *NBER Working Paper No. 22644*, 2016.
- [5] Partha Dasgupta, Amartya Sen, and David Starrett. Notes on the measurement of inequality. *Journal of Economic Theory*, 6(2):180–187, 1973.
- [6] Carmen DeNavas-Walt, Bernadette D. Proctor, and Jessica C. Smith. Income, poverty, and health insurance coverage in the United States: 2011. In *Current Population Report*, number P60-243, pages 1–81. U.S. Census Bureau, 2012.
- [7] Arthur F. Jones, Jr. and Daniel H. Weinberg. The changing shape of the nation’s income distribution 1947–1998. In *Current Population Reports*, number P60-204, pages 1–11. U.S. Census Bureau, 2000.
- [8] Glenn Sheriff and Kelly Maguire. Health risk, inequality indexes, and environmental justice. *Risk Analysis*, page doi.org/10.1111/risa.13562, 2020.
